# Supplementary material
Source: PubMed Central journal article supplement (PMC3001131)
Supplement: NIHMS226297-supplement-supplement_1.pdf [file NIHMS226297-supplement-supplement_1.pdf]

## Supplementary Figure 1

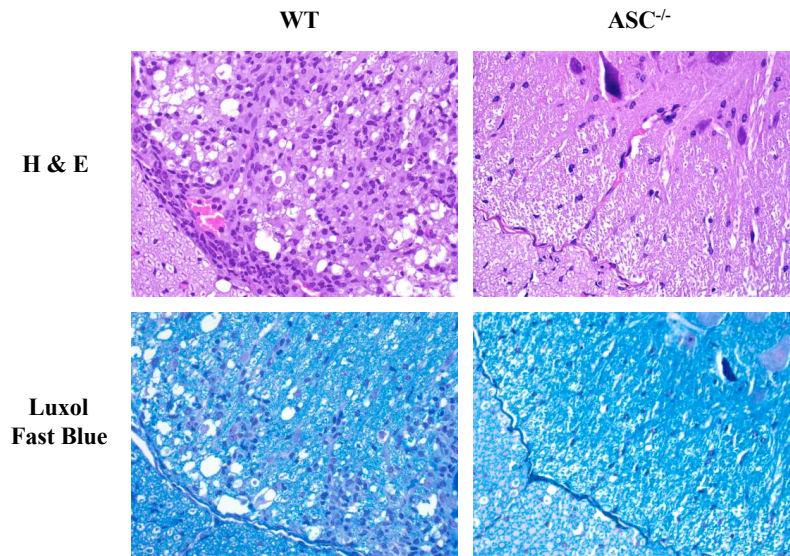

**Supplemental Fig. 1. ASC<sup>-/-</sup> mice are protected from MOG EAE-induced pathological changes.** MOG EAE was induced and spinal cords were removed from euthanized mice 17 days following immunization. Spinal cords were examined for histopathological changes (H & E) and axon demyelination (Luxol Fast Blue). Images are representative of the group.

**Supp. Table 1. Cellular infiltration into the CNS during EAE is impaired in ASC<sup>-/-</sup> mice.**

| Gate                                                   | Cell Type                                  | Wild-type      | ASC <sup>-/-</sup> |
|--------------------------------------------------------|--------------------------------------------|----------------|--------------------|
| CD11b <sup>+</sup> CD45 <sup>hi</sup>                  | Macrophages                                | 23,422 ± 3,602 | 3,634 ± 571        |
| CD11b <sup>+</sup> CD45 <sup>lo</sup>                  | Microglia                                  | 6,122 ± 456    | 8,216 ± 310        |
| CD11b <sup>-</sup> CD45 <sup>hi</sup>                  | Leukocytes                                 | 18,669 ± 2,019 | 469 ± 121          |
| CD4 <sup>+</sup> CD11b <sup>-</sup> CD45 <sup>hi</sup> | CD4 <sup>+</sup> T cells                   | 10,481 ± 1,241 | 223 ± 56           |
| CD8 <sup>+</sup> CD11b <sup>-</sup> CD45 <sup>hi</sup> | CD8 <sup>+</sup> T cells                   | 2,593 ± 334    | 38 ± 16            |
| GR1 <sup>+</sup> CD11b <sup>+</sup> CD45 <sup>hi</sup> | Granulocytes,<br>inflammatory<br>monocytes | 5,853 ± 743    | 1,254 ± 153        |

Cells were harvested from the spinal cords 17 days after immunization. Surface staining with appropriate antibodies and FACS analysis was performed on these cells. Cells were characterized based on gating strategies described previously (21). Data are presented as the average of the total number of cells ± SEM. *n* = 5.
